# Supplementary material for: Single-atom catalysts based on TiN for the electrocatalytic hydrogen evolution reaction: a theoretical study
Source: Royal Society of Chemistry journal article supplement (doi:10.1039/d1cp01861b), 2021-01-01
Supplement: d1cp01861b1.pdf [file d1cp01861b1.pdf]

**Single-atom catalysts based on TiN for the electrocatalytic hydrogen evolution  
reaction: a theoretical study**

Bingling He<sup>1,2</sup>, Jiansheng Shen<sup>1</sup>, Bin Wang<sup>1</sup>, Zhansheng Lu<sup>3</sup>, and Dongwei Ma<sup>2,\*</sup>

*<sup>1</sup>College of Physics and Electronic Engineering, Xinxiang University, Xinxiang  
453003, China*

*<sup>2</sup>Key Laboratory for Special Functional Materials of Ministry of Education, and  
School of Materials Science and Engineering, Henan University, Kaifeng 475004,  
China*

*<sup>3</sup>College of Physics, Henan Normal University, Xinxiang 453007, China*

## **Support Information**

---

\*Corresponding author. E-mail: madw@henu.edu.cn (Dongwei Ma).

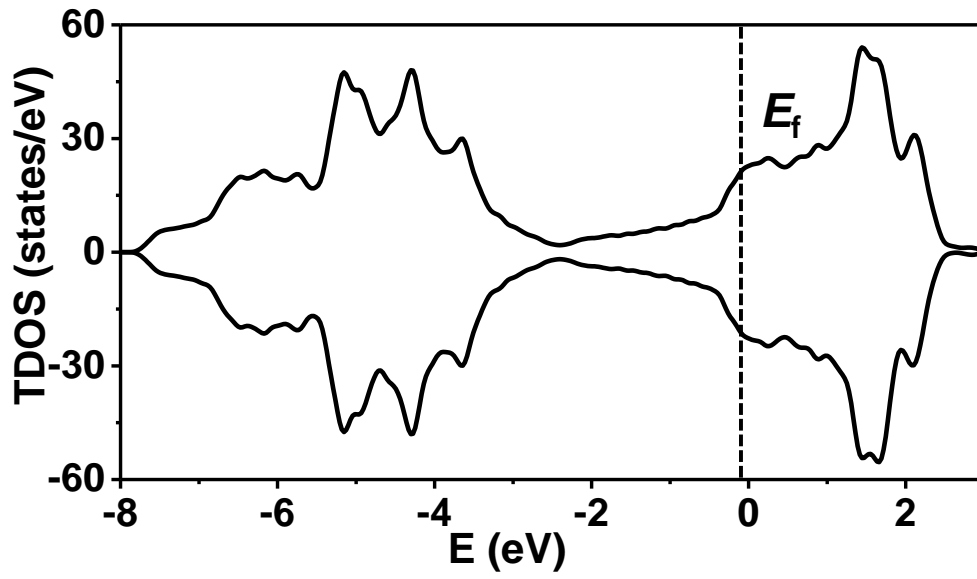

**Fig. S1.** The TDOS for the stoichiometric TiN (100) surface. The Fermi level ( $E_f$ ) is denoted by the dashed line and set to 0 eV.

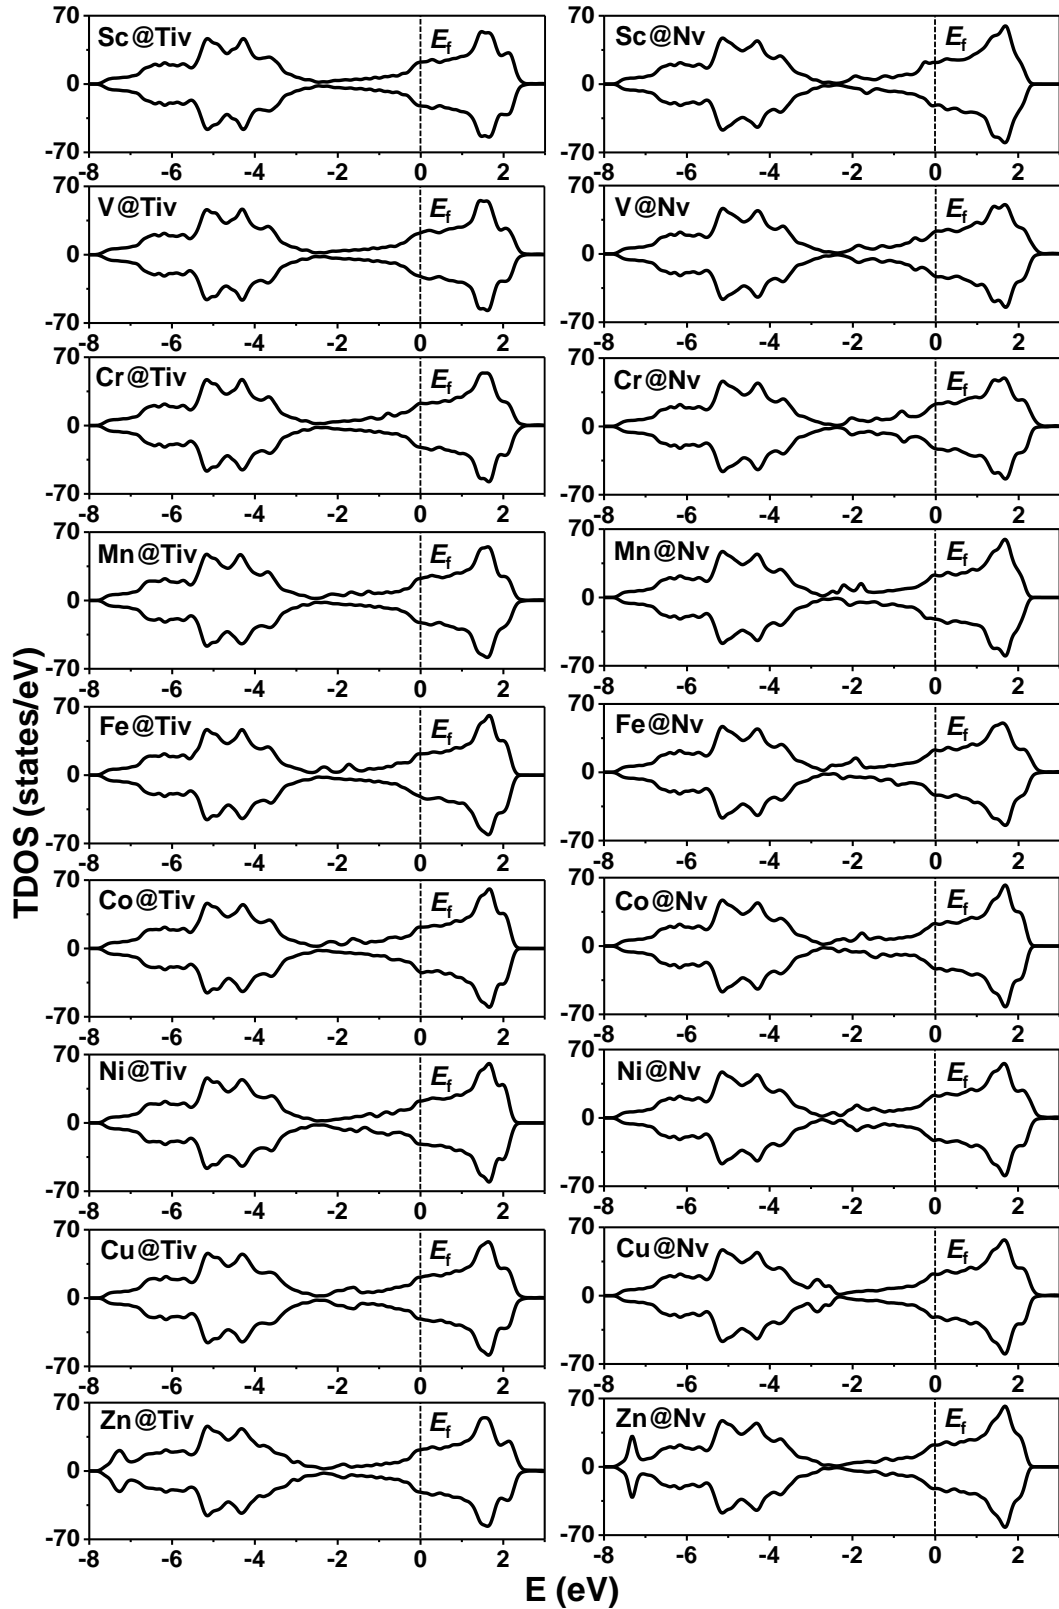

**Fig. S2.** The TDOS for the M@Tiv and M@Nv. M are 3d TM atoms for M@Tiv (left panel) and M@Nv (right panel). The  $E_f$  is denoted by the dashed line and set to 0 eV.

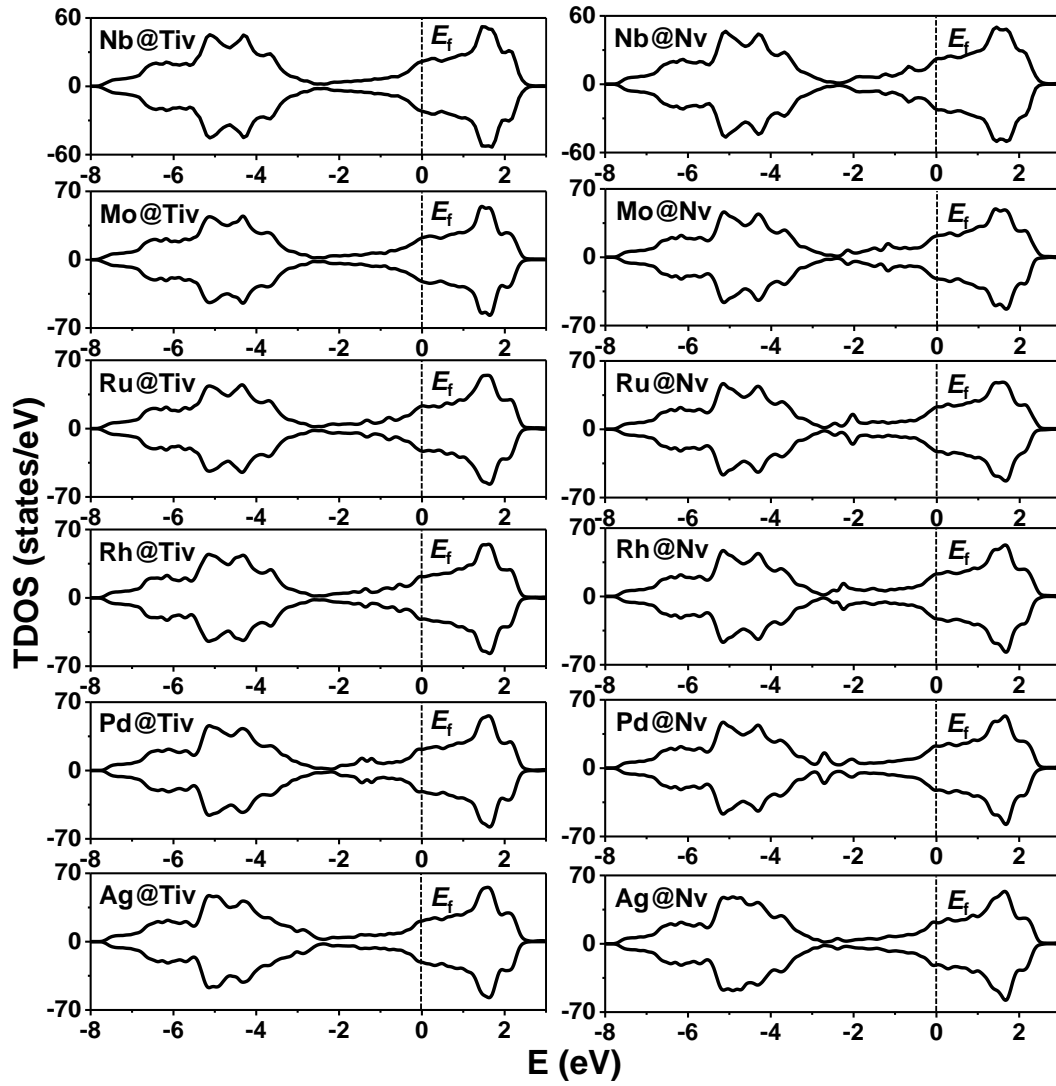

**Fig. S3.** Similar to Fig.2, except that M are 4d TM atoms. The  $E_f$  is denoted by the dashed line and set to 0 eV.

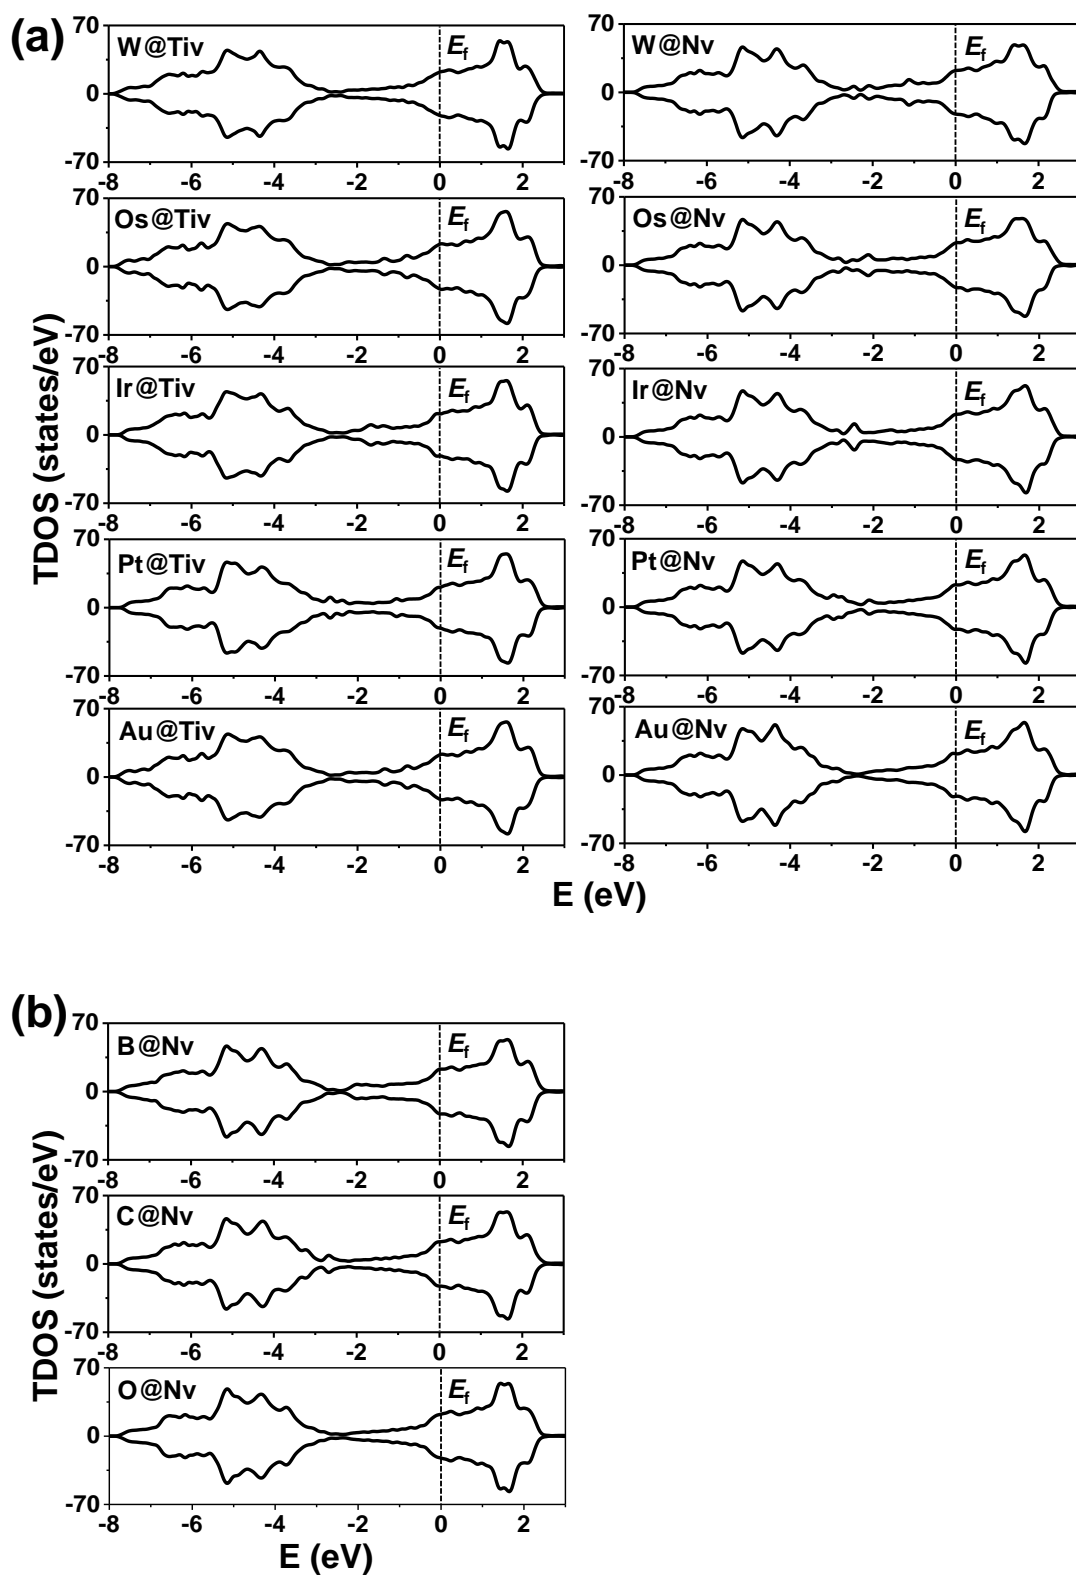

**Fig. S4.** Similar to Fig.2, except that M are 5d TM atoms (a) and B, C and O (b). The  $E_f$  is denoted by the dashed line and set to 0 eV.

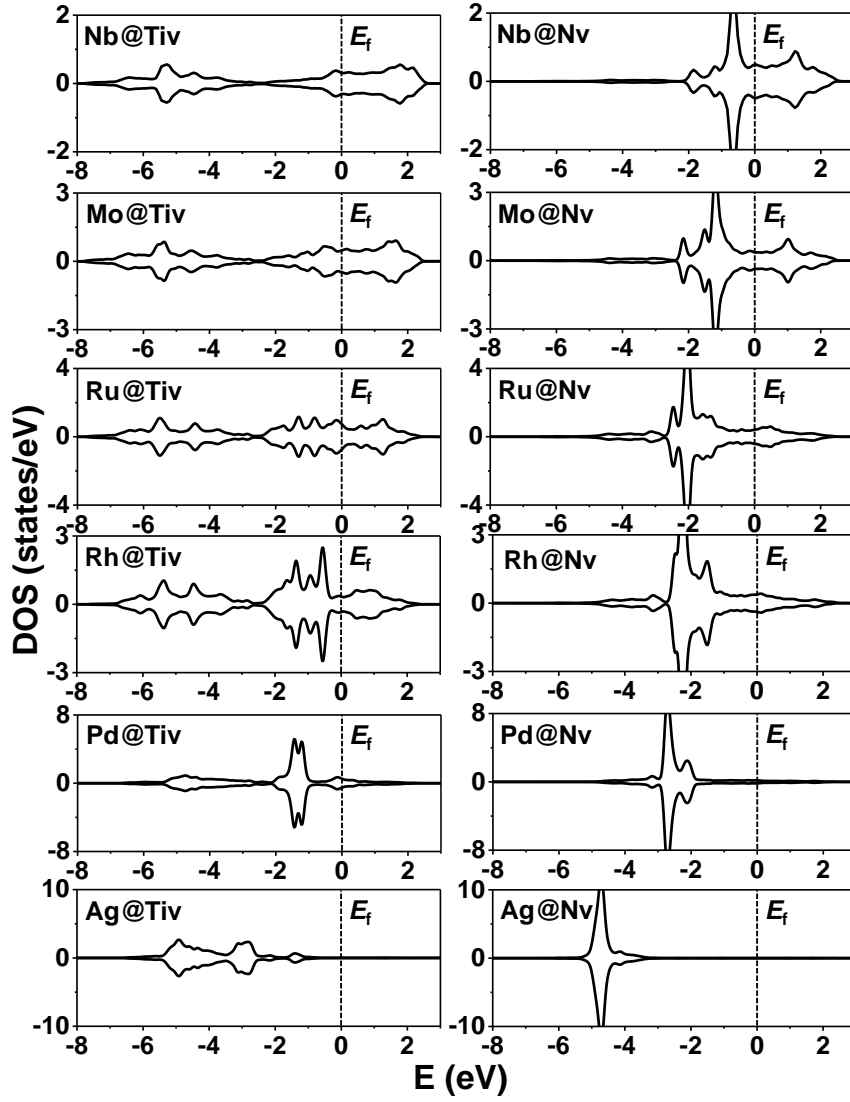

**Fig. S5.** The DOS for the  $d$  orbitals of the  $4d$  TM atoms anchored by the TiN (100) surfaces with Ti vacancy (left panel) and N vacancy (right panel). The  $E_f$  is denoted by the dashed line and set to 0 eV.

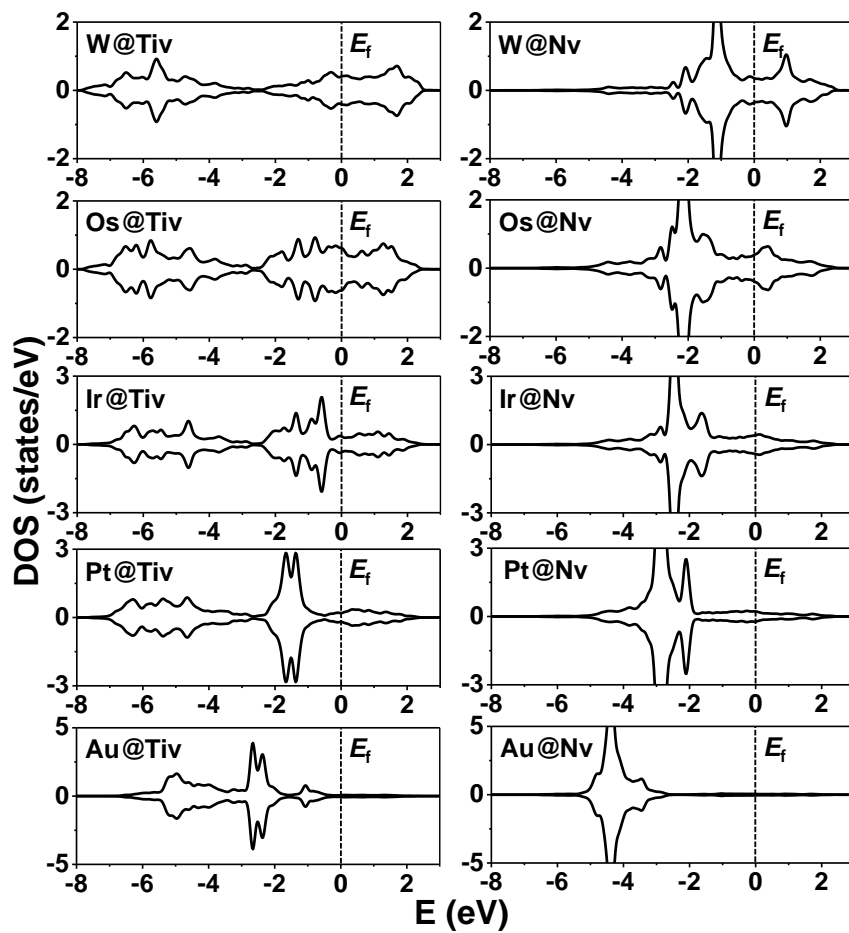

**Fig. S6.** Similar to Fig.4, except that M are 5d TM atoms. The  $E_f$  is denoted by the dashed line and set to 0 eV.

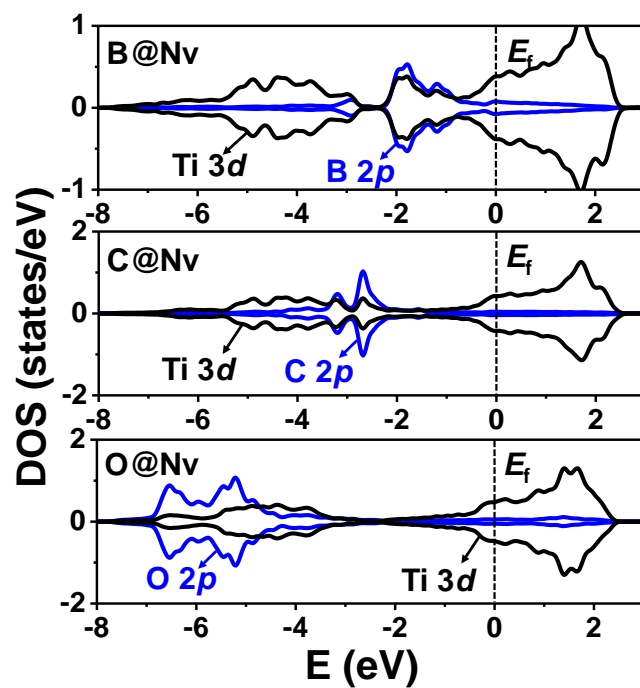

**Fig. S7.** The  $2p$  states of the B, C and O as well as the  $3d$  states of their neighboring Ti atoms for B, C, and O@Nv. The  $E_f$  is denoted by the dashed line and set to 0 eV.



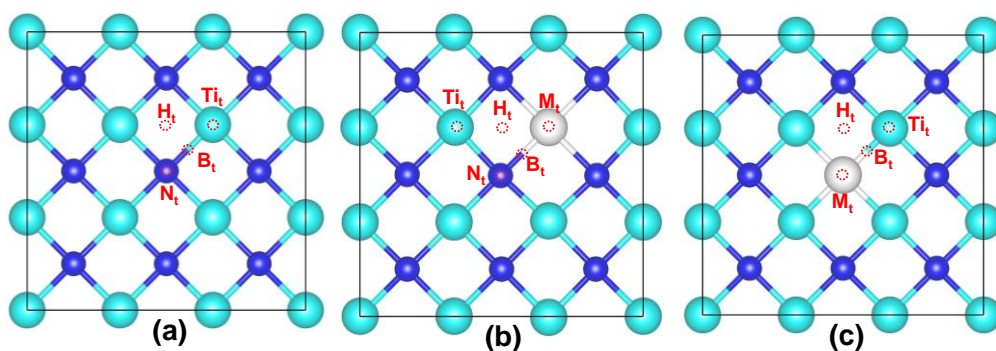

**Fig. S8.** The top views of the first atomic layer for the TiN (100) (a), M@Tiv (b), and M@Nv (c) surfaces with the considered adsorption sites for the atomic H.

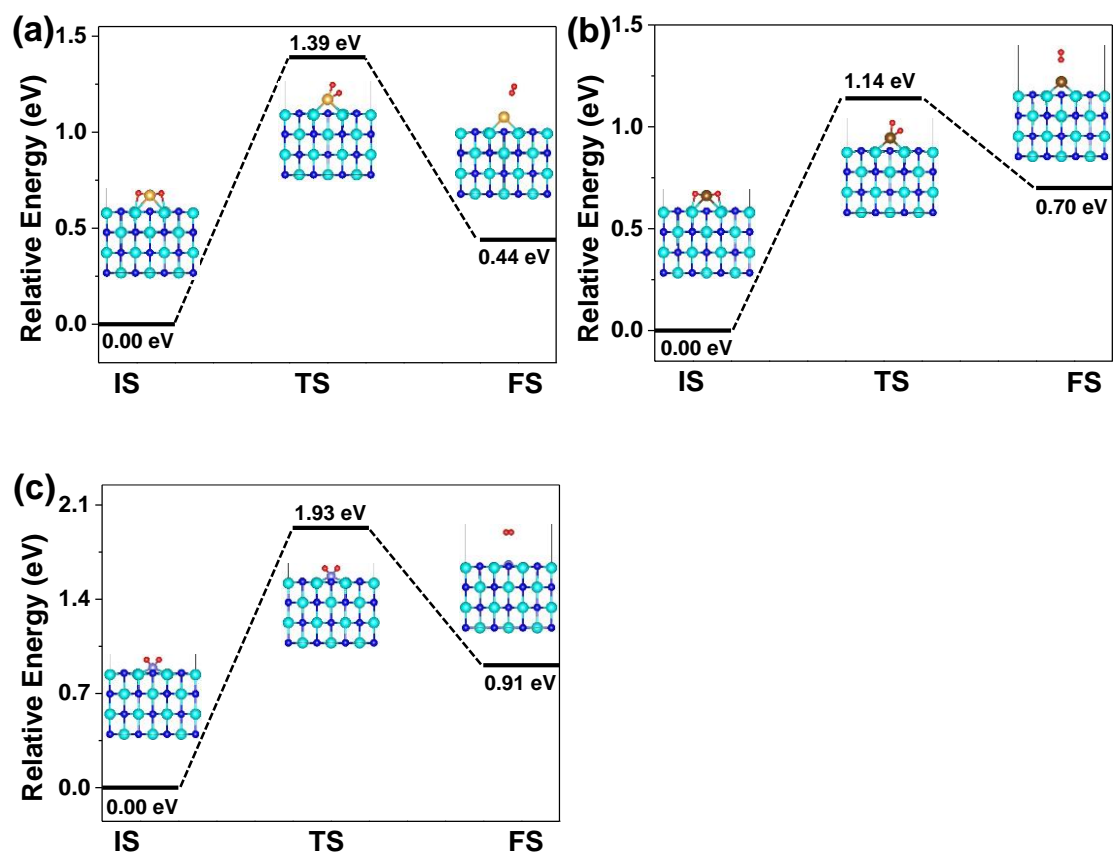

**Fig. S9.** Minimum-energy pathways of the HER under the Tafel mechanism for the Au@Nv (a), Pd@Nv (b) and B@Nv (c) catalysts. The energies of initial state (IS), transition state (TS), and final state (FS) are given relative to the IS, and their corresponding atomic structures are displayed as insets.

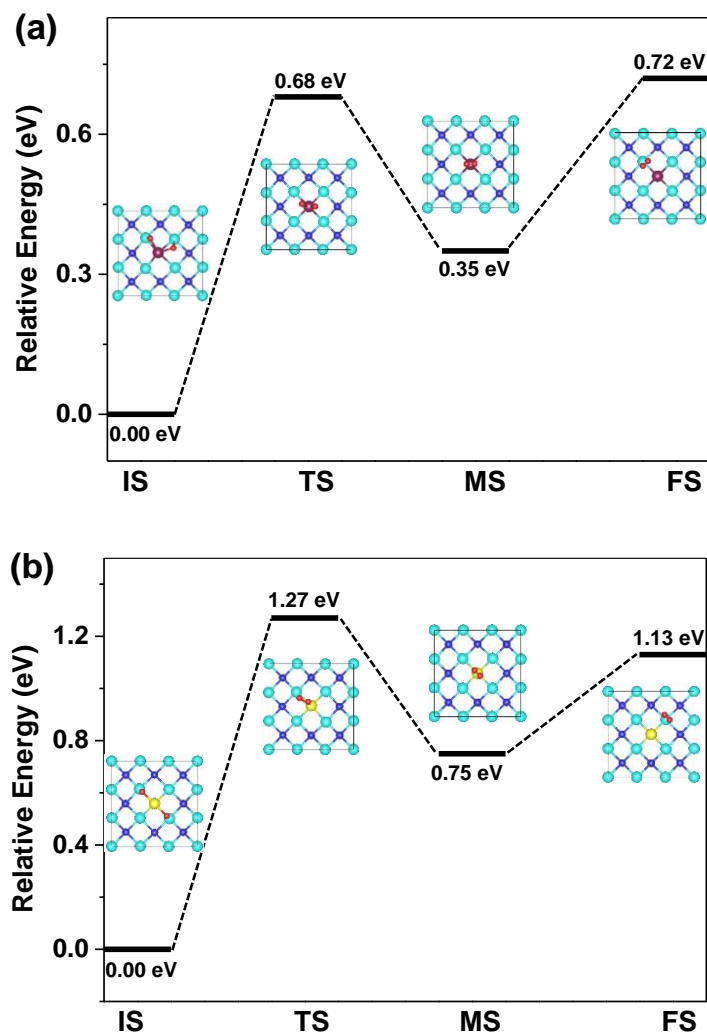

**Fig. S10.** Minimum-energy pathways of the HER under the Tafel mechanism for the W@Nv (a) and Mo@Nv (b). MS is the chemisorption configuration for H<sub>2</sub> molecule, and FS is the physisorption configuration. The energies of IS, TS, intermediate state (MS) and FS are given relative to the IS, and their corresponding atomic structures are displayed as insets.

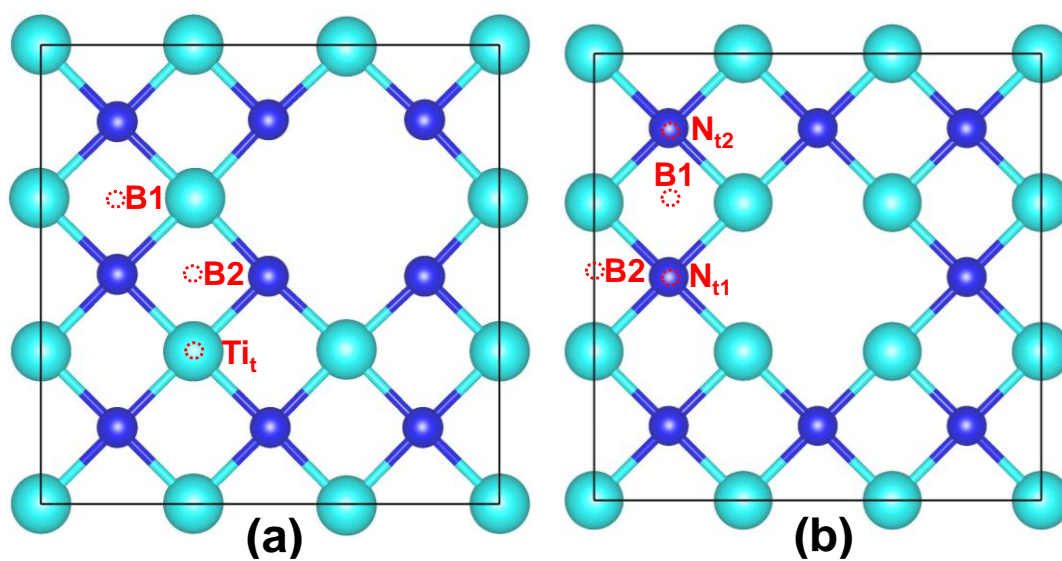

**Fig. S11.** The considered adsorption sites for the TM atoms on the defective TiN (100) surfaces with the Ti vacancy (a) and the N vacancy (b).

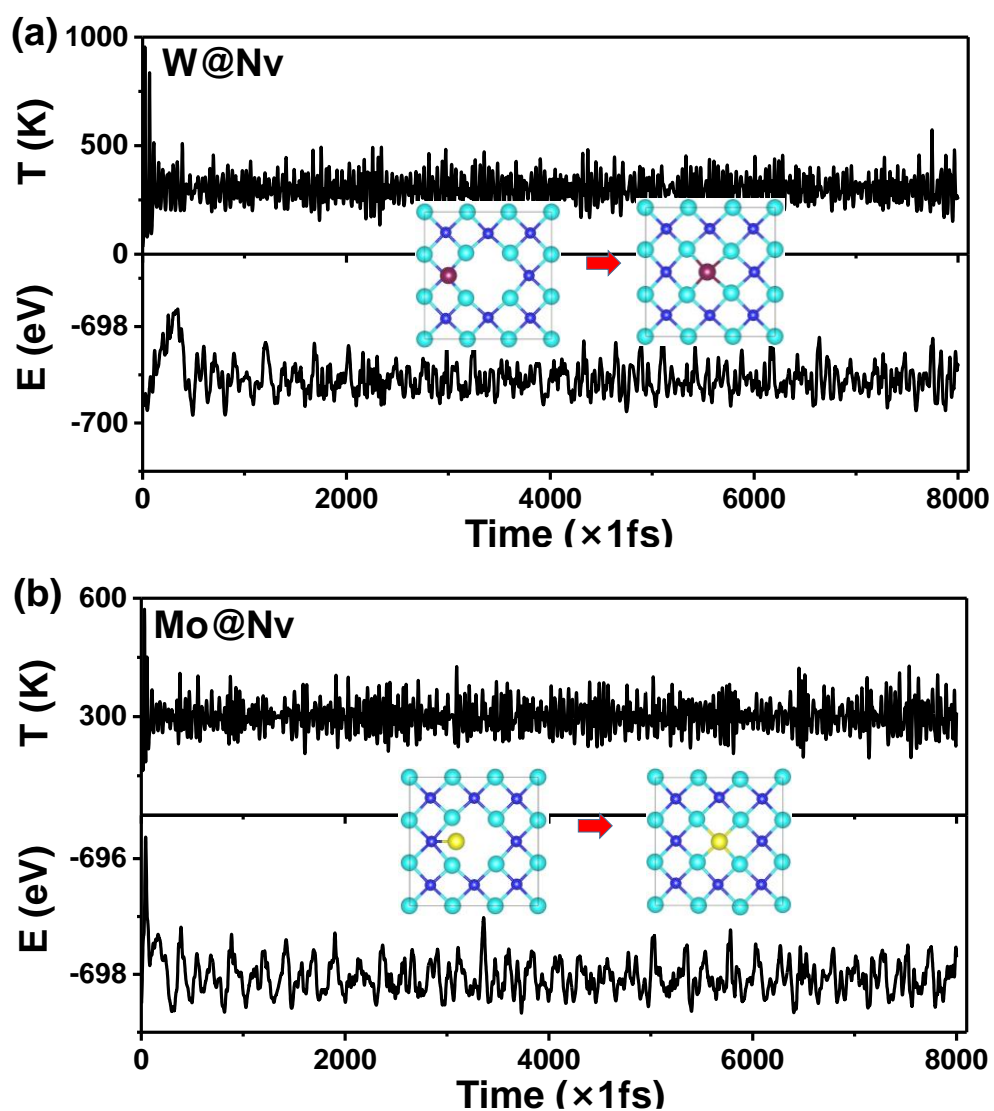

**Fig. S12.** The variations of total energies and temperatures during the ab initio molecular dynamics modelling for  $\text{W@Nv}$  (a) and  $\text{Mo@Nv}$  (b) at the temperature of 300 K. In (a) and (b), the top views of the initial and final atomic structures are inserted.

**Table S1.** Zero-point energy ( $E_{\text{ZPE}}$ , in eV) and entropy multiplied by T (T = 298.15 K and TS in eV) for adsorbed H atom.

|    | $E_{\text{ZPE}}$ |           | TS         |           |
|----|------------------|-----------|------------|-----------|
|    | Ti Vacancy       | N Vacancy | Ti Vacancy | N Vacancy |
| Sc | 0.15             | 0.18      | 0.02       | 0.01      |
| V  | 0.17             | 0.17      | 0.01       | 0.01      |
| Cr | 0.18             | 0.17      | 0.01       | 0.01      |
| Mn | 0.19             | 0.18      | 0.01       | 0.01      |
| Fe | 0.27             | 0.23      | 0.01       | 0.02      |
| Co | 0.27             | 0.15      | 0.01       | 0.03      |
| Ni | 0.27             | 0.16      | 0.01       | 0.02      |
| Cu | 0.27             | 0.17      | 0.01       | 0.01      |
| Zn | 0.16             | 0.17      | 0.03       | 0.01      |
| Nb | 0.16             | 0.17      | 0.02       | 0.01      |
| Mo | 0.19             | 0.17      | 0.01       | 0.02      |
| Ru | 0.21             | 0.18      | 0.01       | 0.02      |
| Rh | 0.21             | 0.17      | 0.01       | 0.02      |
| Pd | 0.25             | 0.15      | 0.01       | 0.03      |
| Ag | 0.15             | 0.16      | 0.03       | 0.01      |
| W  | 0.20             | 0.16      | 0.01       | 0.02      |
| Os | 0.22             | 0.18      | 0.01       | 0.02      |
| Ir | 0.23             | 0.18      | 0.01       | 0.02      |
| Pt | 0.20             | 0.18      | 0.02       | 0.02      |
| Au | 0.20             | 0.15      | 0.02       | 0.01      |
| B  | ---              | 0.19      | ---        | 0.02      |
| C  | ---              | 0.20      | ---        | 0.04      |
| O  | ---              | 0.15      | ---        | 0.02      |

**Table S2.** The Ti and N vacancy formation energies ( $E^f$ , in eV) on the TiN (100) surface under N-lean and N-rich conditions. The values in the brackets are taken from Ref. [1].

|       | Ti          |               | N             |             |
|-------|-------------|---------------|---------------|-------------|
|       | N-lean      | N-rich        | N-lean        | N-rich      |
| $E^f$ | 3.77 (3.40) | -0.18 (-0.04) | -0.79 (-0.42) | 2.80 (3.02) |

**Table S3.** The H binding free energy (in eV) on the stoichiometric TiN (100) surface. The adsorption sites are shown in **Fig. S8(a)**. For the H adsorption at B<sub>t</sub> site, it moves to N<sub>t</sub> site after structural relaxation.

|              | B <sub>t</sub> | H <sub>t</sub> | N <sub>t</sub> | Ti <sub>t</sub> |
|--------------|----------------|----------------|----------------|-----------------|
| $\Delta G_H$ | N <sub>t</sub> | 0.99           | 0.82           | 0.49            |

**Table S4.** The H binding free energy (in eV) for M@Tiv and M@Nv catalysts. The considered adsorption sites for the atomic H are given in **Figs. S8(b)-8(c)**.

|    | M@Tiv          |                |                |                |                 | M@Nv           |                |                |                 |
|----|----------------|----------------|----------------|----------------|-----------------|----------------|----------------|----------------|-----------------|
|    | B <sub>t</sub> | H <sub>t</sub> | N <sub>t</sub> | M <sub>t</sub> | Ti <sub>t</sub> | B <sub>t</sub> | H <sub>t</sub> | M <sub>t</sub> | Ti <sub>t</sub> |
| Sc | M              | Ti             | 0.69           | 0.69           | 0.45            | -0.55          | -0.29          | 0.21           | B               |
| V  | M              | M              | 0.64           | 0.36           | 0.54            | -0.57          | M              | -0.21          | B               |
| Cr | M              | M              | 0.58           | 0.24           | 0.58            | -0.83          | -0.17          | -0.05          | B               |
| Mn | N              | M              | 0.59           | 0.46           | 0.59            | -0.41          | 0.03           | -0.03          | B               |
| Fe | N              | Ti             | 0.52           | 0.60           | 0.67            | -0.28          | M              | -0.21          | B               |
| Co | N              | M              | 0.34           | 0.53           | 0.69            | -0.48          | M              | -0.49          | B               |
| Ni | M              | Ti             | 0.05           | 0.78           | 0.50            | -0.32          | M              | -0.27          | B               |
| Cu | 0.65           | M              | 0.43           | 0.90           | 0.68            | -0.91          | -0.58          | -0.52          | B               |
| Zn | M              | M              | 0.47           | 0.11           | 0.42            | -0.49          | -0.06          | -0.03          | B               |
| Nb | M              | M              | 0.74           | 0.08           | 0.47            | -0.22          | -0.13          | 0.27           | B               |
| Mo | M              | M              | 0.58           | -0.12          | 0.54            | -0.06          | -0.15          | 0.16           | B               |
| Ru | M              | M              | 0.48           | -0.38          | 0.64            | -0.11          | M              | -0.33          | B               |
| Rh | M              | M              | 0.47           | -0.02          | 0.70            | M              | M              | -0.32          | M               |
| Pd | 0.66           | 0.66           | 0.39           | 0.82           | 0.72            | 0.04           | M              | 0.05           | B               |
| Ag | 0.43           | 1.12           | 0.28           | 0.53           | 0.47            | 0.28           | M              | 0.65           | B               |
| W  | M              | M              | 0.60           | -0.37          | 0.54            | -0.16          | -0.10          | -0.09          | B               |
| Os | M              | M              | 0.41           | -0.73          | 0.65            | M              | M              | -0.65          | M               |
| Ir | M              | M              | 0.44           | -0.49          | 0.72            | M              | M              | -0.65          | M               |
| Pt | M              | M              | 1.57           | 0.58           | 1.81            | M              | M              | -0.32          | M               |
| Au | M              | M              | -0.08          | -0.89          | 0.59            | 0.17           | M              | 0.20           | B               |
| B  | ---            | ---            | ---            | ---            | ---             | -0.15          | -0.15          | 0.04           | 0.59            |
| C  | ---            | ---            | ---            | ---            | ---             | M              | M              | 0.29           | 0.63            |
| O  | ---            | ---            | ---            | ---            | ---             | Ti             | 0.85           | 1.12           | 0.39            |

**Table S5.** The binding energies (in eV) for the M atoms near the Ti vacancy of the defective TiN (100) surface, and the energy differences ( $\Delta E_{\text{ad}}$ , in eV) between the most stable configurations and the corresponding M@Tiv systems. The adsorption sites neighboring the Ti vacancy are shown in **Fig. S11(a)**.

|                        | Ni   | Zn   | Nb   | Mo   | Rh   |
|------------------------|------|------|------|------|------|
| B1                     | 3.48 | 0.54 | 4.53 | 4.43 | 4.53 |
| B2                     | B1   | 0.52 | 4.46 | 4.38 | B1   |
| Ti <sub>t</sub>        | 3.42 | 0.58 | 3.91 | 4.05 | 4.54 |
| $\Delta E_{\text{ad}}$ | 1.54 | 1.10 | 5.91 | 4.81 | 1.57 |

**Table S6.** Similar to **Table S5**, except that it is for the TiN (100) surface with the N vacancy. The adsorption sites neighboring the N vacancy are shown in **Fig. S11(b)**.

|                        | Au   | Mo   | Pd   | W    | B    |
|------------------------|------|------|------|------|------|
| B1                     | 2.80 | 4.02 | Vac  | 3.50 | N1   |
| B1                     | 2.79 | 4.09 | 2.73 | 3.57 | 3.45 |
| N <sub>t1</sub>        | Vac  | 4.57 | Vac  | 4.28 | 4.97 |
| N <sub>t2</sub>        | Vac  | 3.78 | 2.94 | 3.78 | 4.67 |
| $\Delta E_{\text{ad}}$ | 1.48 | 0.72 | 1.82 | 1.02 | 1.73 |

### References:

1. R.-Q. Zhang, T.-H. Lee, B.-D. Yu, C. Stampfl and A. Soon, *Phys. Chem. Chem. Phys.*, 2012, **14**, 16552-16557
